# Supplementary material for: Plant Responses Underlying Timely Specialized Metabolites Induction of Brassica Crops
Source: Front Plant Sci. 2022 Feb 3;12:807710. doi: 10.3389/fpls.2021.807710 (PMC8850993; doi:10.3389/fpls.2021.807710)
Supplement: Supplementary Table 1 — Metabolomic dataset of features detected in broccoli leaves using UPLC-Q-TOF-MS/MS. [file Table_1.XLSX]

## Sheet: Table S1
Table S1. Metabolomic dataset of selected as important features (based on VIP-score values of the PLS-DA analysis and on the volcano-plot analysis) contributing to the responses of wounding and M. brassicae feeding behavior from broccoli samples at ZT0.
RT (min)	m/z	Masa neutra	Ionization	Ionization	Molecular Formula	Tentative identification
1.00617	262.057	263.064	neg	[M-H]-	C9H13NO8	unknown
1.00817	404.104	405.112	neg	[M-H]-	C15H21N3O8S	2-(glutathion-s-yl)-2-methylbut-3-enoate
1.00883	191.054	192.061	neg	[M-H]-	C7H12O6	quinic acid
1.00967	387.114	388.122	neg	[M-H]-	C13H24O13	unknown
1.01	179.056	180.063	neg	[M-H]-	C6H12O6	unknown
1.01033	341.109	342.116	neg	[M-H]-		unknown
1.03	194.09	193.083	neg	[M-H]-	C14H11N	unknown
1.21083	178.88	179.888	neg	[M-H]-		unknown
10.489	337.092	338.099	neg	[M-H]-	C12H14N6O6	unknown
11.49	367.103	368.111	neg	[M-H]-	C17H20O9	unknown
13.8228	175.024	176.032	neg	[M-H]-	C6H8O6	ascorbic acid
13.8252	350.088	351.095	neg	[M-H]-	C16H17NO8	indole-acetic-acid-o-glucuronide
13.8292	244.061	245.069	neg	[M-H]-	C13H11NO4	indole derivative
20.6523	174.055	175.063	neg	[M-H]-	C10H9NO2	indole-acetic-acid
21.0862	414.058	415.066	neg	[M-H]-		unknown
21.4372	433.14	434.147	neg	[M-H]-	C20H18N8O4	unknown
23.15	531.28	532.288	neg	[M-H]-	C22H40N6O9	unknown
24.3875	309.206	310.214	neg	[M-H]-	C18H30O4	indole derivative
1.0095	163.068	162.06	pos	[M+H]+	C4H10N4OS	indole derivative
1.01	136.081	113.091	pos	[M+Na]+	C5H11N3	unknown
1.5055	123.055	122.048	pos	[M+H]+	C6H6N2O	nicotinamide
10.481	147.044	146.036	pos	[M+H]+	C9H6O2	coumarin isomer
12.57	409.126	408.119	pos	[M+H]+	C16H25O10P	unknown
13.8172	323.123	322.116	pos	[M+H]+	C15H18N2O6	(indol-3-yl)acetyl-l-phenylalanine
13.8207	306.111	305.104	pos	[M+H]+	C14H15N3O5	indole derivative
13.8253	130.067	129.059	pos	[M+H]+	C9H7N	quinoline/isquinoline/ion iaa
13.826	306.097	305.092	pos	[M+H]+	C15H15NO6	ascorbigen
15.9872	146.061	145.054	pos	[M+H]+	C9H7NO	indole-carboxaldehyde
15.9905	118.068	117.061	pos	[M+H]+	C8H7N	phenylacetonitrile
18.6865	130.068	129.061	pos	[M+H]+	C9H7N	unknown
19.2893	737.223	736.216	pos	[M+H]+	C34H40O18	unknown
20.226	130.086	129.078	pos	[M+H]+	C6H11NO2	methyl proline
20.625	176.076	175.068	pos	[M+H]+	C10H9NO2	indole acetate
20.8918	130.067	129.06	pos	[M+H]+	C9H7N	quinoline/isquinoline/ion iaa
21.07	130.068	129.06	pos	[M+H]+	C6H11NS	isothiocyanato-methylbutane
21.4455	130.067	129.06	pos	[M+H]+	C9H7N	quinoline/isquinoline/ion iaa
21.7465	130.067	129.06	pos	[M+H]+	C6H11NS	isothiocyanato-methylbutane
22.34	200.211	199.204	pos	[M+H]+	C11H25N3	unknown
22.4545	130.067	129.06	pos	[M+H]+	C9H7N	quinoline/isquinoline/ion iaa
22.5	225.176	224.168	pos	[M+H]+	C14H24O2	unknown
22.9593	130.067	129.06	pos	[M+H]+	C6H11NS	isothiocyanato-methylbutane
23.52	228.248	227.241	pos	[M+H]+	C13H29N3	unknown
24.015	130.067	129.06	pos	[M+H]+	C6H11NS	isothiocyanato-methylbutane
24.82	286.305	285.298	pos	[M+H]+	C15H35N5	unknown
27.18	425.232	424.225	pos	[M+H]+	C22H28N6O3	unknown
28.45	600.436	599.429	pos	[M+H]+		unknown
29.71	589.265	588.258	pos	[M+H]+	C34H41N2O3PS	unknown

## Sheet: Table S2
m/z	Neutral mass	ADDUCT	Retention time (min)	Intesity mean in control plants	Intesity mean in wounded plants
262.057	263.064	[M-H]-	1.00617	11975.2	26648.3
293.063	292.056	[M+H]+	1.00617	42649.6	33412
180.086	179.078	[M+H]+	1.00683	25516.8	13781.7
162.953	163.96	[M-H]-	1.00717	20165.2	9053.67
381.079	342.116	[M+K]+	1.00717	59149.2	31268.3
144.066	143.058	[M+H]+	1.008	13151.2	21904.3
404.104	405.112	[M-H]-	1.00817	115014	43604.3
130.05	147.053	[M-H2O+H]+	1.00883	55722.8	130418
191.054	192.061	[M-H]-	1.00883	35535.2	100200
150.076	149.069	[M+H]+	1.00933	16368.4	22090.7
104.107	103.1	[M+H]+	1.0095	268075	350823
116.071	115.063	[M+H]+	1.0095	203022	187489
163.068	162.06	[M+H]+	1.0095	177998	72603.7
387.114	388.122	[M-H]-	1.00967	79393.2	23236
439.113	440.12	[M-H]-	1.00983	28099.2	11516.3
136.081	113.091	[M+Na]+	1.01033	294914	359014
179.056	180.063	[M-H]-	1.01033	24206	19883
341.109	342.116	[M-H]-	1.01033	60102.4	16806
133.025	134.032	[M-H]-	1.01117	43864.4	50203.3
124.039	101.049	[M+Na]+	1.01267	210698	180825
256.082	255.075	[M+H]+	1.01317	23593.2	21543.7
175.119	174.111	[M+H]+	1.01667	4072	13317.3
137.076	136.068	[M+H]+	1.01783	22467.2	0
189.039	188.032	[M+H]+	1.02017	26383.2	20716
330.074	331.081	[M-H]-	1.02033	35345.6	62239.7
118.086	117.079	[M+H]+	1.02533	38071.2	34588
130.087	129.079	[M+H]+	1.02833	24978.8	61612.3
191.035	192.042	[M-H]-	1.03417	146082	254063
194.09	193.083	[M+H]+	1.03417	58052	50567.3
111.017	112.025	[M-H]-	1.03467	18514.8	33493.7
214.09	213.082	[M+H]+	1.054	1.67816e+06	1663976
141.114	140.106	[M+H]+	1.142	21869.2	21123.3
178.88	179.888	[M-H]-	1.21083	8263.2	21054.3
136.062	135.055	[M+H]+	1.47883	253136	373640
130.087	129.079	[M+H]+	1.48417	10660.8	31124
123.055	122.048	[M+H]+	1.5055	53402.8	128899
129.018	128.011	[M+H]+	1.50583	19121.2	32777.3
191.035	192.042	[M-H]-	1.51033	164874	278982
111.017	112.025	[M-H]-	1.51267	21674	39587.3
139.003	137.995	[M+H]+	1.51383	12432	22143.7
175.024	192.027	[M-H2O+H]+	1.51767	15006	28594.7
330.073	331.081	[M-H]-	1.528	28740.8	49088.7
166.072	165.065	[M+H]+	1.63467	22715.2	32902
132.102	131.094	[M+H]+	1.85767	28455.2	38694.7
146.063	145.056	[M+H]+	3.153	17316.4	92052.3
129.037	128.03	[M+H]+	3.15383	4232	21242.7
101.042	100.035	[M+H]+	3.1605	7060.4	35668.3
120.081	119.073	[M+H]+	3.7395	32097.6	47809.3
146.06	145.053	[M+H]+	4.23767	19415.2	18424.7
114.091	113.084	[M+H]+	5.7255	64371.2	34412.7
236.071	235.064	[M+H]+	6.25683	20242.4	17583.3
236.072	235.064	[M+H]+	6.672	10977.2	16875.7
323.161	324.168	[M-H]-	8.5335	24032.8	27589.7
130.065	129.058	[M+H]+	8.60317	17588	47388.7
130.065	129.058	[M+H]+	8.82733	31004	35064.7
207.058	206.051	[M+H]+	8.835	12792.4	18000
447.091	448.098	[M-H]-	8.84017	74546	101606
163.039	162.032	[M+H]+	8.92167	96112	172669
353.117	354.124	[M-H]-	8.92483	91700.4	157604
114.091	113.084	[M+H]+	9.806	276478	265712
147.044	146.036	[M+H]+	10.481	8791.2	30563.7
337.092	338.099	[M-H]-	10.489	6323.6	24320.3
130.159	129.152	[M+H]+	10.6563	25872.8	24984
353.116	354.124	[M-H]-	11.4482	19719.2	26667
163.039	162.032	[M+H]+	11.4483	20286.4	29157.3
177.054	176.047	[M+H]+	11.4852	34525.6	53680
367.103	368.111	[M-H]-	11.4935	38745.2	60732.7
318.157	317.149	[M+H]+	11.5092	16296.4	32304.7
477.104	478.111	[M-H]-	11.5397	74518.4	73872.3
160.075	159.068	[M+H]+	11.5433	29036	26805
355.132	356.139	[M-H]-	12.2208	26097.2	15029.7
431.228	432.235	[M-H]-	12.3072	28460.8	14097.7
409.126	408.119	[M+H]+	12.5718	31557.6	17734.7
207.065	206.058	[M+H]+	12.5803	68565.6	25575
385.145	386.152	[M-H]-	12.5828	115251	48219.3
340.26	339.253	[M+H]+	12.8502	78171.2	74752
384.281	385.288	[M-H]-	12.854	22556	22223.3
130.065	129.058	[M+H]+	13.4363	11669.2	37119
160.076	159.068	[M+H]+	13.455	17459.2	40212
477.103	478.111	[M-H]-	13.4653	24874	95855
323.123	322.116	[M+H]+	13.8172	18044.8	86782.3
306.111	305.104	[M+H]+	13.8207	51343.6	165382
175.024	176.032	[M-H]-	13.8228	18895.6	70855
350.088	351.095	[M-H]-	13.8252	30613.6	108995
130.067	129.059	[M+H]+	13.8253	248468	892449
633.173	632.166	[M+H]+	13.8255	11992.8	33741.3
306.097	305.092	[M+H]+	13.826	51343.6	165382
141.114	140.107	[M+H]+	13.8287	8162.4	19272.7
244.061	245.069	[M-H]-	13.8292	20012	79480.7
633.206	632.199	[M+H]+	14.6573	5915.2	23484.7
130.065	129.058	[M+H]+	14.6657	5309.2	41058
136.07	135.062	[M+H]+	14.8685	4409.2	14636.7
453.344	452.337	[M+H]+	15.1185	133378	132449
497.375	498.382	[M-H]-	15.1253	26365.2	24891.7
487.345	488.353	[M-H]-	15.1295	21378.4	20522.3
160.075	159.068	[M+H]+	15.2875	10681.2	25896.3
197.117	196.11	[M+H]+	15.495	44893.2	25373.7
107.071	106.064	[M+H]+	15.5392	24792	24651.7
185.115	162.125	[M+Na]+	15.5432	44559.2	44892
146.061	145.054	[M+H]+	15.9872	22932	75640.3
118.068	117.061	[M+H]+	15.9905	21009.2	62856.3
103.039	102.032	[M+H]+	16.4398	29853.6	30164.3
517.156	516.149	[M+H]+	16.754	24797.6	23305.3
566.429	565.421	[M+H]+	16.7742	42062.8	41728.7
403.078	404.086	[M-H]-	17.4835	1748.4	30442
321.031	322.04	[M-H]-	17.6847	117859	118722
772.27	771.263	[M+H]+	18.3073	20670	22379.3
207.065	206.058	[M+H]+	18.311	22464	34324
531.172	530.164	[M+H]+	18.3142	142192	190000
369.119	368.111	[M+H]+	18.3153	33574.4	45316.3
777.225	776.218	[M+H]+	18.3203	23619.2	24168.3
747.214	746.207	[M+H]+	18.5562	26435.6	26016
339.108	338.101	[M+H]+	18.559	41849.6	53393.7
501.161	500.154	[M+H]+	18.5592	137830	168427
742.259	741.252	[M+H]+	18.5593	21438.8	21920.7
177.054	176.047	[M+H]+	18.566	36833.6	35125.7
693.196	692.189	[M+H]+	18.6737	772	21538
353.135	352.128	[M+H]+	18.681	913.2	41778.7
336.108	335.101	[M+H]+	18.6825	14196	210748
130.068	129.061	[M+H]+	18.6865	4250	71324
274.094	275.101	[M-H]-	18.6873	4458.8	77764
380.129	381.136	[M-H]-	18.6873	3522	60809.3
334.12	335.129	[M-H]-	18.689	9517.2	138287
305.089	304.081	[M+H]+	18.6907	1731.6	25937
160.076	159.068	[M+H]+	18.6913	14255.6	224390
191.143	190.136	[M+H]+	18.8113	35386	9157.33
160.076	159.068	[M+H]+	19.2457	4165.6	74333.3
737.223	736.216	[M+H]+	19.2893	32291.2	66484
707.223	706.216	[M+H]+	19.4405	38724.8	68570.7
201.129	202.137	[M-H]-	19.4537	12233.2	9593.67
141.001	139.993	[M+H]+	19.7987	459910	792081
130.086	129.078	[M+H]+	20.226	27696.4	81242.7
299.111	298.103	[M+H]+	20.2968	34345.2	33960
157.05	156.043	[M+H]+	20.2973	30015.6	28331.3
176.076	175.068	[M+H]+	20.625	5675.2	36765.3
174.055	175.063	[M-H]-	20.6523	11019.2	24474.3
130.067	129.06	[M+H]+	20.8918	3558	39062
130.068	129.06	[M+H]+	21.07	5571.2	31766.7
414.058	415.066	[M-H]-	21.0862	4440.4	27991.7
313.163	290.173	[M+Na]+	21.2042	228207	228408
217.099	216.092	[M+H]+	21.208	28179.2	34259.7
173.079	172.073	[M+H]+	21.2102	147266	143745
163.133	162.125	[M+H]+	21.2112	162999	167022
289.189	290.196	[M-H]-	21.2132	76657.6	76340.7
435.156	434.148	[M+H]+	21.4372	1755.6	42318.7
433.14	434.147	[M-H]-	21.4407	858	28545.7
130.067	129.06	[M+H]+	21.4455	5470.8	113124
181.122	180.115	[M+H]+	21.5585	112979	79033
212.092	213.1	[M-H]-	21.6837	60539.6	0
130.067	129.06	[M+H]+	21.7465	2547.2	35715
141	139.993	[M+H]+	21.7613	868660	357120
221.136	222.143	[M-H]-	21.9127	100469	101004
158.154	157.147	[M+H]+	21.9437	187510	186722
285.29	284.283	[M+H]+	21.953	198504	194074
274.274	273.267	[M+H]+	21.9622	84753.6	84927.3
343.296	342.288	[M+H]+	21.9668	46846.8	49257
240.232	239.225	[M+H]+	21.9683	73195.2	76282
115.11	114.103	[M+H]+	21.9977	24496.4	22874.3
271.188	270.181	[M+H]+	21.9977	37898.8	39082.3
288.29	287.282	[M+H]+	22.1702	63734.4	62244.7
187.09	186.082	[M+H]+	22.3335	3037.6	23632.3
200.211	199.204	[M+H]+	22.338	671426	635171
249.133	250.14	[M-H]-	22.3612	27901.6	25618
288.289	287.282	[M+H]+	22.3658	269066	266433
465.166	464.159	[M+H]+	22.3678	613.2	25928
130.067	129.06	[M+H]+	22.4545	2927.6	29726.7
160.076	159.068	[M+H]+	22.465	1775.2	64962
225.176	224.168	[M+H]+	22.5013	93653.6	96923.3
145.052	144.045	[M+H]+	22.52	1048.4	23289.7
288.29	287.282	[M+H]+	22.5445	275871	275162
214.253	213.245	[M+H]+	22.5568	423836	406266
113.059	112.052	[M+H]+	22.5615	37350.4	36802
244.263	243.256	[M+H]+	22.6077	34300.8	34322.3
459.489	458.481	[M+H]+	22.6523	35957.2	35224.3
230.248	229.24	[M+H]+	22.6553	2.29752e+06	2260338
236.124	237.132	[M-H]-	22.8142	42165.6	41188
293.201	294.209	[M-H]-	22.8142	249710	251437
161.096	160.089	[M+H]+	22.8182	39153.2	32726.7
245.079	244.071	[M+H]+	22.88	45972.4	28040.3
177.054	176.047	[M+H]+	22.8818	153835	151768
149.023	148.016	[M+H]+	22.8865	421876	397468
130.067	129.06	[M+H]+	22.9593	2640.4	24626.7
157.122	156.114	[M+H]+	22.9648	20670.8	18970.7
255.122	254.115	[M+H]+	23.019	21441.6	21106.7
311.186	310.179	[M+H]+	23.0212	52626.8	52928.7
309.206	310.214	[M-H]-	23.0267	58770.8	59274.7
469.28	486.283	[M-H2O+H]+	23.1407	73540	53020.7
325.238	324.23	[M+H]+	23.1422	80927.2	60394
531.28	532.288	[M-H]-	23.1493	41887.6	27898.7
313.321	312.314	[M+H]+	23.156	62715.2	61969
353.269	352.262	[M+H]+	23.1778	38216.4	33367.7
694.405	693.398	[M+H]+	23.1808	18658.4	16462.3
699.36	698.353	[M+H]+	23.1873	24585.6	22866.7
336.29	335.282	[M+H]+	23.2312	34708	37018.3
174.992	173.985	[M+H]+	23.2623	22125.6	21620
371.327	370.32	[M+H]+	23.3287	90490.8	92035.3
268.264	267.257	[M+H]+	23.3317	69040.4	69834.7
325.238	324.23	[M+H]+	23.3378	165573	127555
995.562	994.555	[M+H]+	23.338	34260.4	26048.3
509.272	486.283	[M+Na]+	23.3385	90233.2	78756.3
504.317	503.31	[M+H]+	23.3413	49763.6	37557
233.19	232.182	[M+H]+	23.3435	103435	76563.3
135.116	134.109	[M+H]+	23.3457	21472.4	16261
531.325	532.332	[M-H]-	23.3457	78657.6	57229
261.221	260.214	[M+H]+	23.4032	23659.2	19425
353.269	352.262	[M+H]+	23.4072	72454.8	62460.7
694.405	693.398	[M+H]+	23.4092	34791.6	29636.7
699.361	698.353	[M+H]+	23.4163	40191.2	36195.7
214.124	213.117	[M+H]+	23.418	927690	887476
102.001	100.994	[M+H]+	23.421	333431	325303
518.325	517.318	[M+H]+	23.4383	18946.4	19512.7
316.321	315.313	[M+H]+	23.5042	142406	139329
225.232	224.225	[M+H]+	23.5227	99262.8	98178.7
272.295	271.287	[M+H]+	23.5227	21610	21646
130.067	129.06	[M+H]+	23.5242	408590	390646
239.162	238.154	[M+H]+	23.5627	110584	105089
111.117	128.12	[M-H2O+H]+	23.5712	199269	198042
518.324	517.317	[M+H]+	23.6373	23867.2	19904.7
242.284	241.277	[M+H]+	23.7292	231959	219663
288.254	287.246	[M+H]+	23.7522	120126	118447
106.086	105.079	[M+H]+	23.7537	93792	88489.3
258.279	257.272	[M+H]+	23.78	1.77044e+06	1.73746e+06
515.551	514.544	[M+H]+	23.8585	38642.4	37365
170.056	169.049	[M+H]+	23.8852	19866.8	20342
111.117	110.11	[M+H]+	23.9108	225683	217647
304.3	303.293	[M+H]+	23.9987	23782.4	23590.7
130.067	129.06	[M+H]+	24.015	7086	49122
364.321	363.314	[M+H]+	24.1605	96368.4	116907
253.141	252.134	[M+H]+	24.1682	24286.4	23608
171.1	170.092	[M+H]+	24.1703	27246.8	21620.3
129.055	128.048	[M+H]+	24.1717	26030	26310.7
341.353	340.346	[M+H]+	24.2928	22352	21997.3
497.311	514.315	[M-H2O+H]+	24.3628	26677.2	24263
309.232	310.239	[M-H]-	24.3875	25865.2	11952.3
277.205	278.212	[M-H]-	24.5002	22517.2	21511.7
353.269	352.262	[M+H]+	24.5687	121002	105116
261.221	260.214	[M+H]+	24.5732	41520	35700.3
532.349	531.342	[M+H]+	24.5733	67069.6	61415.7
537.304	514.315	[M+Na]+	24.5742	57621.6	54462.7
423.274	422.267	[M+H]+	24.5782	36840.8	36235
559.358	560.365	[M-H]-	24.5808	21452	19510.3
293.234	294.241	[M-H]-	24.582	28324.8	38337
199.169	198.162	[M+H]+	24.5902	111695	103084
111.117	110.11	[M+H]+	24.5918	120182	119179
325.199	324.192	[M+H]+	24.5933	108136	103969
265.169	266.177	[M-H]-	24.6385	387967	388037
325.199	324.192	[M+H]+	24.689	109627	90268
215.164	214.157	[M+H]+	24.6965	27866.4	26424.3
111.117	128.12	[M-H2O+H]+	24.6997	123854	122039
200.201	199.193	[M+H]+	24.7382	26831.6	25612.7
399.359	398.351	[M+H]+	24.7612	49190.8	49122.3
296.295	295.288	[M+H]+	24.7673	22944.4	23169.3
286.305	285.298	[M+H]+	24.8228	51567.2	47961.7
496.338	495.331	[M+H]+	24.8952	22016.8	12445.7
332.331	331.324	[M+H]+	24.9583	24677.6	24472.3
284.331	283.324	[M+H]+	25.0015	88677.2	88921
289.154	266.165	[M+Na]+	25.0987	81878.4	77196.3
211.109	210.102	[M+H]+	25.1032	40995.6	38804.3
155.047	154.039	[M+H]+	25.1057	114296	90263
342.337	341.33	[M+H]+	25.1477	15284.4	23743
298.347	297.339	[M+H]+	25.1902	20422.4	19393.3
112.087	111.08	[M+H]+	25.2358	20147.6	28487.7
327.078	326.071	[M+H]+	25.3312	641221	647296
675.135	674.128	[M+H]+	25.3312	28243.2	27813
369.384	368.377	[M+H]+	25.3332	21205.6	19932.3
344.105	343.097	[M+H]+	25.3342	20242	20261.3
141.114	140.106	[M+H]+	25.342	204177	203017
151.098	150.091	[M+H]+	25.405	20584.8	19370
316.285	315.278	[M+H]+	25.469	272301	257324
360.304	361.312	[M-H]-	25.4782	29801.2	28968.3
235.169	234.162	[M+H]+	25.5207	51897.6	48713
269.207	268.2	[M+H]+	25.5207	23147.2	21293.7
273.17	272.163	[M+H]+	25.5207	36839.2	34879
452.322	451.315	[M+H]+	25.5222	404704	385835
317.197	316.19	[M+H]+	25.5238	80866.8	77053.7
457.278	434.288	[M+Na]+	25.5238	431162	423303
233.173	234.18	[M-H]-	25.5242	22300	21938.3
107.072	106.064	[M+H]+	25.5247	28821.6	28457.7
145.122	162.124	[M-H2O+H]+	25.526	64835.6	61440.7
253.264	252.256	[M+H]+	25.55	113832	113740
311.194	312.201	[M-H]-	25.69	35765.6	47693.3
213.149	212.141	[M+H]+	25.7635	22270.4	21164
277.18	276.173	[M+H]+	25.8135	22176.8	20460
161.096	160.088	[M+H]+	25.8185	56476	57106
163.076	162.068	[M+H]+	26.0038	16001.6	19716.3
243.243	242.236	[M+H]+	26.0213	126317	128040
185.116	184.108	[M+H]+	26.086	45263.6	44185
281.173	280.165	[M+H]+	26.0877	42388.4	42645
129.057	128.05	[M+H]+	26.0903	23886.8	20590
279.186	280.193	[M-H]-	26.1608	177996	179143
780.558	779.551	[M+H]+	26.2548	8240	19442.7
273.183	272.175	[M+H]+	26.2602	35769.6	34815.3
301.141	278.152	[M+Na]+	26.2657	169742	155866
223.096	222.089	[M+H]+	26.2668	22619.2	21449.3
149.023	166.027	[M-H2O+H]+	26.2693	1.23174e+06	1.15431e+06
121.029	120.022	[M+H]+	26.271	48453.2	47234.7
756.557	755.55	[M+H]+	26.279	25957.6	26766.7
309.199	310.206	[M-H]-	26.3103	146004	148125
427.39	426.383	[M+H]+	26.3187	24757.2	26791
205.086	204.079	[M+H]+	26.3295	89698	90540.3
157.121	156.114	[M+H]+	26.3502	14627.2	15164
367.21	366.202	[M+H]+	26.351	29204	28154.7
171.1	170.092	[M+H]+	26.3572	35832.4	33837
157.121	312.228	[M+H+H]2+	26.3663	9347.2	3753.67
249.206	250.213	[M-H]-	26.3732	22044.4	24596
177.091	176.084	[M+H]+	26.4497	43326	40692.3
228.233	227.226	[M+H]+	26.4942	20620.4	18939.7
250.165	251.172	[M-H]-	26.6123	48828.8	47855
340.394	339.387	[M+H]+	26.7007	25336.8	24886.3
228.233	227.225	[M+H]+	26.7747	93743.6	79988.3
732.549	731.542	[M+H]+	26.8178	27386	30033
688.521	687.514	[M+H]+	26.8763	45046.8	45988.3
644.496	643.489	[M+H]+	26.9303	67870.4	70453.3
368.425	367.418	[M+H]+	26.96	36004.8	35673.3
605.425	604.417	[M+H]+	26.992	19637.2	19829.3
600.468	599.461	[M+H]+	26.9935	102090	105239
121.966	120.959	[M+H]+	27.0288	95108	91284.7
561.397	560.39	[M+H]+	27.0505	28434	27550
556.442	555.435	[M+H]+	27.052	141490	140900
124.087	123.079	[M+H]+	27.054	24870.4	26075.7
131.962	130.955	[M+H]+	27.0643	58569.2	57022.7
512.416	511.409	[M+H]+	27.109	184951	189771
517.371	494.382	[M+Na]+	27.1197	45187.6	44580.3
468.39	467.383	[M+H]+	27.166	166556	160010
473.345	450.356	[M+Na]+	27.166	120208	118643
425.232	424.225	[M+H]+	27.1737	42319.2	29050.7
344.316	343.309	[M+H]+	27.1845	310450	294664
141.114	140.106	[M+H]+	27.1848	205595	250218
309.204	308.197	[M+H]+	27.189	211143	217583
325.211	326.218	[M-H]-	27.1903	27544.8	28331.7
293.203	294.21	[M-H]-	27.1917	114699	120545
377.303	378.31	[M-H]-	27.1917	118742	114790
388.338	389.345	[M-H]-	27.1917	34565.2	33177.7
353.229	354.236	[M-H]-	27.1947	91049.2	92146.3
111.117	110.109	[M+H]+	27.1968	2.38858e+06	2429991
199.169	198.162	[M+H]+	27.1968	687230	670524
429.319	406.33	[M+Na]+	27.2203	197044	197928
115.964	229.913	[M+H+H]2+	27.2223	31604.8	32493.3
424.364	423.356	[M+H]+	27.2245	116974	114485
363.311	362.304	[M+H]+	27.2692	308391	300008
195.123	194.116	[M+H]+	27.2707	33253.6	32368.3
380.337	379.33	[M+H]+	27.275	39149.6	37598.7
341.266	318.278	[M+Na]+	27.2985	259908	252486
151.097	150.09	[M+H]+	27.2992	179394	173266
228.233	227.225	[M+H]+	27.3138	252025	239896
297.24	274.251	[M+Na]+	27.3455	208453	206537
107.07	106.063	[M+H]+	27.3477	284388	275413
368.425	367.418	[M+H]+	27.3832	127119	119210
105.045	104.038	[M+H]+	27.421	27459.6	22596.7
242.249	241.242	[M+H]+	27.5067	30304.8	27967.7
370.332	369.324	[M+H]+	27.565	118961	117900
106.086	105.079	[M+H]+	27.568	37139.6	35324.7
353.229	354.236	[M-H]-	27.6375	76771.6	75518
277.24	278.247	[M-H]-	27.6878	137386	145848
279.231	278.224	[M+H]+	27.6893	32713.6	32906.7
377.173	378.18	[M-H]-	27.6917	36254	44452.3
141.114	140.106	[M+H]+	27.6945	64915.6	281827
271.274	270.267	[M+H]+	27.7683	142641	142549
195.123	194.115	[M+H]+	27.7898	26347.6	25496.7
395.241	394.234	[M+H]+	27.9162	50526	49816.7
325.211	326.218	[M-H]-	27.9188	22400	29025
570.458	569.45	[M+H]+	27.9362	27430.4	28092.7
975.573	974.565	[M+H]+	27.956	25029.2	22435.7
970.616	969.609	[M+H]+	27.9585	22806.4	18625.3
611.469	610.462	[M+H]+	27.9623	34845.6	30454.3
773.524	772.517	[M+H]+	27.967	42131.2	36145.7
526.432	525.425	[M+H]+	28.001	38752	38146.7
482.405	481.398	[M+H]+	28.063	41407.2	40093.7
421.352	420.345	[M+H]+	28.1188	27969.6	28457.7
438.378	437.371	[M+H]+	28.1215	27352	28082.3
427.246	426.239	[M+H]+	28.1255	20043.2	20077.7
127.112	126.105	[M+H]+	28.1318	31749.6	32074.7
377.326	376.319	[M+H]+	28.1773	58886.8	57375.7
151.097	150.089	[M+H]+	28.2053	39896	38260
355.282	332.292	[M+Na]+	28.2065	44844.4	42884
256.263	255.256	[M+H]+	28.2273	50674.8	48773.3
311.254	310.247	[M+H]+	28.2567	27032.8	24909.3
758.572	757.565	[M+H]+	28.3318	17822.4	17834
780.533	779.526	[M+H]+	28.352	26936.8	19909
745.493	762.496	[M-H2O+H]+	28.3545	118544	81886
583.435	582.428	[M+H]+	28.3587	95158	62681.7
253.238	254.245	[M-H]-	28.3982	31101.2	31414
600.436	599.412	[M+H]+	28.4477	118768	72276.7
239.248	238.241	[M+H]+	28.4677	3114712	3.06935e+06
127.112	126.105	[M+H]+	28.5523	24358.4	23818.7
282.279	281.272	[M+H]+	28.554	26540	25964
425.288	424.281	[M+H]+	28.6202	51816.4	54951.3
171.14	170.132	[M+H]+	28.6217	68062	68940.3
583.434	582.427	[M+H]+	28.6217	74082	49157
745.492	762.495	[M-H2O+H]+	28.6268	64782	49978.7
279.255	280.262	[M-H]-	28.6293	56303.6	59246
195.123	194.116	[M+H]+	28.63	23843.6	24515.3
716.553	715.546	[M+H]+	28.6478	22072.4	21449.3
672.528	671.52	[M+H]+	28.7157	34762	33994
745.492	744.485	[M+H]+	28.7188	66196	45332.7
583.435	582.428	[M+H]+	28.728	66410.8	51033.3
778.542	777.534	[M+H]+	28.729	73703.2	110732
243.196	242.188	[M+H]+	28.7303	19894.4	20829.7
409.293	408.286	[M+H]+	28.7342	23489.6	24353
628.5	627.493	[M+H]+	28.785	53634.8	51622.3
584.473	583.465	[M+H]+	28.8513	82997.6	81026
397.259	398.266	[M-H]-	28.9087	24862.8	17183.7
545.401	544.394	[M+H]+	28.9128	25536.8	24374.7
540.447	539.44	[M+H]+	28.9145	117513	113636
496.421	495.414	[M+H]+	28.9777	142013	135823
501.376	500.369	[M+H]+	28.9807	56088	54822.3
372.346	371.339	[M+H]+	28.996	56868.8	57072.7
106.086	105.079	[M+H]+	29.006	24034.4	23259.7
452.394	451.387	[M+H]+	29.0347	116233	113248
457.35	434.361	[M+Na]+	29.0377	119668	115206
429.312	428.304	[M+H]+	29.0848	22057.2	21534.3
408.365	407.358	[M+H]+	29.0855	50488.8	49294
391.342	390.335	[M+H]+	29.0885	226603	224551
195.123	194.116	[M+H]+	29.0932	24666.4	23226.7
367.293	368.3	[M-H]-	29.1223	92648.8	118388
369.298	346.309	[M+Na]+	29.1232	240305	235314
151.097	150.089	[M+H]+	29.1282	103494	99785.3
256.264	255.256	[M+H]+	29.1408	123520	121473
377.303	378.311	[M-H]-	29.164	117240	114290
325.271	302.282	[M+Na]+	29.1772	93412	89429
107.071	106.064	[M+H]+	29.1813	62356.8	59239
293.203	294.21	[M-H]-	29.1983	0	234818
611.469	610.462	[M+H]+	29.5198	49540	46681
111.117	110.109	[M+H]+	29.5285	25264	19927.3
773.526	790.529	[M-H2O+H]+	29.5337	65273.6	57466.7
808.562	807.554	[M+H]+	29.534	21301.6	18766.3
293.203	294.211	[M-H]-	29.5657	410808	309445
255.253	256.261	[M-H]-	29.5677	115502	121760
141.114	140.106	[M+H]+	29.5692	570870	567397
355.186	356.194	[M-H]-	29.5738	104484	101423
593.278	592.27	[M+H]+	29.586	345782	535853
585.456	584.448	[M+H]+	29.6873	68388.4	48922.7
926.591	925.583	[M+H]+	29.6923	68641.2	55439.7
931.546	930.538	[M+H]+	29.697	47301.2	39235.7
589.265	588.258	[M+H]+	29.7093	33986	52863.3
381.203	382.211	[M-H]-	29.7813	22151.2	22184.7
281.271	282.278	[M-H]-	29.788	132660	131772
741.458	740.451	[M+H]+	29.8652	20058.4	14500.3
736.508	735.5	[M+H]+	29.8655	37310.8	24477
363.311	362.303	[M+H]+	29.917	15055.6	6285
313.321	312.314	[M+H]+	29.925	21660.4	18108.3
171.099	170.092	[M+H]+	29.9497	32385.6	32822.3
173.079	172.071	[M+H]+	29.9573	34972.4	34227.7
217.103	216.096	[M+H]+	29.9573	49508.8	39936.7
105.957	104.95	[M+H]+	29.9597	22696	27298
130.159	129.152	[M+H]+	29.9605	49140.4	48007
230.248	229.241	[M+H]+	29.9682	432836	415344
429.318	428.311	[M+H]+	29.9685	15030.4	21487
121.966	120.959	[M+H]+	29.9697	302014	294913
225.232	224.225	[M+H]+	29.9697	43222.4	41745.7
236.072	235.064	[M+H]+	29.9697	174594	169454
214.253	213.246	[M+H]+	29.9712	206996	205959
258.279	257.272	[M+H]+	29.9712	246852	238131
741.54	2221.6	[M+H+H2]3+	29.9712	23696.8	22608.3
385.292	384.285	[M+H]+	29.9733	30073.2	38084.7
144.982	143.975	[M+H]+	29.9743	60630.4	60548.7
285.29	284.283	[M+H]+	29.9747	49571.6	27012
739.889	2216.65	[M+H+H2]3+	29.9747	8348.4	16545
242.284	241.277	[M+H]+	29.9758	121835	120355
228.268	227.261	[M+H]+	29.9773	178556	172536
239.248	238.241	[M+H]+	29.9773	329915	318262
131.962	130.955	[M+H]+	29.9788	197162	191863
124.087	123.08	[M+H]+	29.9805	163222	162479
200.237	199.23	[M+H]+	29.9805	319481	311936
341.267	340.26	[M+H]+	29.9813	30821.6	42097
284.296	566.578	[M+H+H]2+	29.9837	78728.4	80666

## Sheet: Table S3
m/z	Neutral mass	ADDUCT	Retention time (min)	Intesity mean in control plants	Intesity mean in wounded plants
189.056	188.048	[M+H]+	1	5208	13409
102.058	101.051	[M+H]+	1.01	16782.7	7182.67
104.071	103.064	[M+H]+	1.01	193122	5437
104.11	103.103	[M+H]+	1.01	110472	109337
104.131	103.124	[M+H]+	1.01	488	122018
116.034	115.027	[M+H]+	1.01	147860	2888
116.091	115.084	[M+H]+	1.01	535.333	129186
133.025	134.032	[M-H]-	1.01	159587	159018
136.026	135.019	[M+H]+	1.01	24935.7	0
152.051	151.044	[M+H]+	1.01	11540	23861.7
163.028	162.019	[M+H]+	1.01	133313	0
163.072	162.064	[M+H]+	1.01	72881.3	96986.7
179.07	180.078	[M-H]-	1.01	33677.3	24722.7
180.1	179.093	[M+H]+	1.01	11777	23166
273.089	272.082	[M+H]+	1.01	23453.7	4779
273.116	272.109	[M+H]+	1.01	4113.67	7450.67
305.016	306.023	[M-H]-	1.01	22416.7	25717
341.136	342.144	[M-H]-	1.01	52587	53376
360.162	359.155	[M+H]+	1.01	15561	10560
381.093	380.086	[M+H]+	1.01	35807	52162.3
387.146	388.153	[M-H]-	1.01	69896	72400.7
404.137	405.145	[M-H]-	1.01	50758.7	62539.3
439.115	440.122	[M-H]-	1.01	28273.3	28137.3
475.17	476.177	[M-H]-	1.01	23091.3	25925.7
116.074	115.067	[M+H]+	1.02	98162.7	39906.3
118.049	117.042	[M+H]+	1.02	46280	93
124.003	101.013	[M+Na]+	1.02	145531	154.667
127.002	125.995	[M+H]+	1.02	36996.7	114.333
130.014	147.018	[M-H2O+H]+	1.02	106597	42.6667
136.072	135.065	[M+H]+	1.02	15730	36366.3
180.057	179.049	[M+H]+	1.02	20620.3	190.333
214.104	213.096	[M+H]+	1.02	600032	876772
256.072	255.065	[M+H]+	1.02	32939	6502
256.093	255.086	[M+H]+	1.02	6895.67	9020.33
325.115	324.107	[M+H]+	1.02	24479.3	11645.3
118.092	117.085	[M+H]+	1.03	21725	30471.7
124.045	123.038	[M+H]+	1.03	105607	143242
130.053	147.058	[M-H2O+H]+	1.03	194909	64346.3
130.094	129.087	[M+H]+	1.03	9923.67	27180
214.068	213.06	[M+H]+	1.03	1.20928e+06	299335
262.117	261.11	[M+H]+	1.03	28184.7	1176.33
275.044	276.051	[M-H]-	1.03	27866.3	28741
111.018	112.025	[M-H]-	1.04	30611	26902.3
191.035	192.042	[M-H]-	1.04	231557	219051
194.09	193.083	[M+H]+	1.04	38385	0
194.132	193.125	[M+H]+	1.05	18230	19167.7
294.096	293.089	[M+H]+	1.06	29731.7	14170
372.073	373.08	[M-H]-	1.06	266809	231731
141.078	140.071	[M+H]+	1.15	15725.3	0
141.123	140.115	[M+H]+	1.17	8229	11209
133.025	134.033	[M-H]-	1.33	33926	34639
275.044	276.051	[M-H]-	1.33	26401.3	22247.3
136.068	135.061	[M+H]+	1.48	15632.3	43507
290.111	291.118	[M-H]-	1.48	42328.3	9910.33
388.07	389.077	[M-H]-	1.48	24033.7	6393
111.03	110.022	[M+H]+	1.5	93.6667	14212.7
123.017	122.01	[M+H]+	1.51	35173.7	0
128.982	127.975	[M+H]+	1.51	18508	0
139.012	138.004	[M+H]+	1.51	11780.7	15087.3
111.018	112.025	[M-H]-	1.52	39113.7	34975
129.026	128.017	[M+H]+	1.52	16124	22001
191.035	192.043	[M-H]-	1.52	278583	262295
215.03	214.023	[M+H]+	1.52	14195	11126.3
130.054	129.047	[M+H]+	1.53	72652.7	34937
214.994	213.987	[M+H]+	1.53	15592.7	4990
132.065	131.058	[M+H]+	1.86	22879.3	774
132.11	131.103	[M+H]+	1.86	17390	25377
374.088	375.095	[M-H]-	2.01	26656	32456
268.092	267.084	[M+H]+	2.37	21373.3	0
136.026	135.019	[M+H]+	2.38	19396.3	0
268.113	267.106	[M+H]+	2.38	7176.67	13893.3
294.097	293.089	[M+H]+	2.52	23080.3	6223
132.055	131.048	[M+H]+	2.53	39336.7	68546
372.073	373.081	[M-H]-	2.53	428235	347698
132.012	131.005	[M+H]+	2.54	67721.3	659
120.044	119.037	[M+H]+	3.74	37664.3	307.667
120.087	119.08	[M+H]+	3.76	19697.7	45885.7
134.069	133.062	[M+H]+	3.95	24821.7	15279.7
374.089	375.096	[M-H]-	3.96	228307	126748
463.087	464.095	[M-H]-	4.09	34640.3	20780.7
114.094	113.087	[M+H]+	7.57	41781	42617.7
130.074	129.067	[M+H]+	8.82	12108.3	15464
447.09	448.098	[M-H]-	8.85	51711.3	28844
163.006	161.999	[M+H]+	8.92	26230	0
353.116	354.123	[M-H]-	8.93	43444.3	29610
114.055	113.048	[M+H]+	9.82	189977	0
114.095	113.088	[M+H]+	9.82	95645	92990.3
422.093	423.1	[M-H]-	10.27	37105	32195.3
147.05	146.042	[M+H]+	10.48	19113.7	15688
337.119	338.126	[M-H]-	10.48	47753	22677
147.008	146	[M+H]+	10.49	33719.7	226.667
130.123	129.115	[M+H]+	10.67	18221.7	133.333
130.167	129.16	[M+H]+	10.68	8967.67	17875.3
367.132	368.139	[M-H]-	11.5	23861	11882.3
160.042	159.035	[M+H]+	11.54	16750.7	385
160.088	159.081	[M+H]+	11.54	12270.7	5913.33
477.103	478.111	[M-H]-	11.56	64731.3	58025.3
325.096	324.089	[M+H]+	12.19	8558	9489
466.15	934.315	[M-H-H]2-	12.21	14447	14856
431.228	432.235	[M-H]-	12.29	21193.3	36457.7
385.144	386.151	[M-H]-	12.59	19021	14252
362.252	361.245	[M+H]+	12.83	18339.7	8947
374.25	375.258	[M-H]-	12.84	30310.7	18526.3
340.262	339.255	[M+H]+	12.85	65705.7	13775.3
384.281	385.288	[M-H]-	12.87	36369.7	22860.7
611.179	610.172	[M+H]+	13.02	21356.7	7023.33
163.051	162.044	[M+H]+	13.17	9997.33	11418.3
295.069	296.077	[M-H]-	13.17	15703.3	22929
339.11	338.103	[M+H]+	13.17	20133	3610.67
949.17	948.163	[M+H]+	13.17	14626.7	0
949.278	948.271	[M+H]+	13.17	0	16644.7
133.025	134.032	[M-H]-	13.2	14384	20771
477.103	478.11	[M-H]-	13.49	31259	19116
193.064	192.057	[M+H]+	13.64	19552.7	19653
133.036	132.029	[M+H]+	13.65	8771.67	19271.7
193.022	192.015	[M+H]+	13.65	35872.7	0
209.062	210.07	[M-H]-	13.65	42825.7	46883.7
325.083	326.09	[M-H]-	13.65	43821.3	49567.7
133.025	134.032	[M-H]-	13.66	32695	35491
503.271	502.263	[M+H]+	13.79	41016	31376.7
130.073	129.066	[M+H]+	13.82	25736	76410.7
130.029	129.021	[M+H]+	13.83	37527	1354.67
453.364	452.356	[M+H]+	15.12	90326.3	68779.3
497.375	498.382	[M-H]-	15.13	42151.3	25248
487.345	488.353	[M-H]-	15.14	33016.7	20779.7
197.09	196.083	[M+H]+	15.5	20840	3138.67
185.086	162.094	[M+Na]+	15.52	32642.3	0
107.074	106.067	[M+H]+	15.55	8378	8883
185.129	162.138	[M+Na]+	15.55	16705.7	15260
643.142	642.134	[M+H]+	15.81	13467.3	7591
117.053	116.046	[M+H]+	15.82	868.333	14500.7
116.997	115.99	[M+H]+	15.83	17732.7	539.333
117.038	116.03	[M+H]+	15.83	12356	9927
144.993	143.986	[M+H]+	15.83	127835	2176.67
145.038	144.03	[M+H]+	15.83	62226.3	107344
177.024	176.017	[M+H]+	15.83	272622	0
177.068	176.061	[M+H]+	15.83	128917	144599
193.066	194.074	[M-H]-	15.83	405283	414654
328.104	327.097	[M+H]+	15.83	13595.7	7411.33
333.06	332.053	[M+H]+	15.83	86205	20123.7
149.025	148.017	[M+H]+	15.84	22492.7	1312.33
149.069	148.061	[M+H]+	15.84	10130.7	19022.3
309.087	310.094	[M-H]-	15.84	246205	243601
141.124	140.117	[M+H]+	15.96	4744.33	14136
363.08	362.072	[M+H]+	15.96	41755.3	22546.7
147.004	145.997	[M+H]+	15.97	35164	276.333
358.113	357.106	[M+H]+	15.97	15023.3	10370.3
358.125	357.117	[M+H]+	15.97	22892.3	21350.3
703.151	702.144	[M+H]+	15.97	19924.3	12177.3
119.013	118.005	[M+H]+	15.98	22617.7	65.3333
119.056	118.048	[M+H]+	15.98	15628.3	23819
175.008	174.001	[M+H]+	15.98	121868	0
207.042	206.035	[M+H]+	15.98	214069	80453.7
207.08	206.073	[M+H]+	15.98	138269	166272
341.089	340.082	[M+H]+	15.98	25328.3	6846.67
147.049	146.042	[M+H]+	15.99	23345.3	39448.3
175.052	174.045	[M+H]+	15.99	79643.7	97072.3
223.079	224.087	[M-H]-	15.99	424279	491664
339.1	340.107	[M-H]-	15.99	262055	304380
103.064	102.056	[M+H]+	16.48	401	20816.7
283.709	565.404	[M+H+H]2+	16.77	24019.3	0
566.449	565.441	[M+H]+	16.77	26627	6357
283.721	565.427	[M+H+H]2+	16.78	6608.33	18448.3
187.112	188.119	[M-H]-	17.19	29557.7	12704
321.031	322.04	[M-H]-	17.69	131510	121699
531.192	530.185	[M+H]+	18.31	18518	13509
501.182	500.174	[M+H]+	18.55	17047.7	13871.7
201.129	202.136	[M-H]-	19.48	14612.7	11547.7
299.108	298.101	[M+H]+	20.29	30337.7	5756
157.016	156.008	[M+H]+	20.3	19813.7	91
291.186	290.178	[M+H]+	21.2	11310	22003
313.163	290.173	[M+Na]+	21.2	198012	79186.7
163.099	162.091	[M+H]+	21.21	116623	2914.33
163.145	162.137	[M+H]+	21.21	56035.7	56457
173.048	172.04	[M+H]+	21.21	100303	129
173.092	172.085	[M+H]+	21.21	50726.3	50373.3
217.076	216.069	[M+H]+	21.21	23845.7	6262
217.112	216.105	[M+H]+	21.21	12081.7	12105.7
273.159	272.151	[M+H]+	21.21	36628.7	0
273.175	272.168	[M+H]+	21.21	7437	21927.3
289.189	290.196	[M-H]-	21.21	116490	75755.3
212.092	213.099	[M-H]-	21.53	54903.7	0
181.092	180.085	[M+H]+	21.56	43588.3	102.333
181.136	180.129	[M+H]+	21.57	20603.7	23526.3
221.136	222.143	[M-H]-	21.92	107744	97859
158.12	157.113	[M+H]+	21.94	131047	0
285.295	284.288	[M+H]+	21.94	33075.7	67073.3
158.166	157.158	[M+H]+	21.95	65576.3	63572
285.283	284.276	[M+H]+	21.95	135962	34148.7
240.214	239.207	[M+H]+	21.96	43073.7	10969.3
240.243	239.236	[M+H]+	21.96	20641.7	23323.7
274.265	273.258	[M+H]+	21.96	57756.7	13874
343.297	342.29	[M+H]+	21.96	34057.7	7205.67
274.281	273.274	[M+H]+	21.97	14120	29108.7
271.196	270.188	[M+H]+	21.99	7032	13564.7
115.073	114.066	[M+H]+	22	16682	259.333
115.114	114.106	[M+H]+	22	8258.33	8061
115.131	114.124	[M+H]+	22	0	12175.3
271.177	270.17	[M+H]+	22	33495.7	6361.67
288.284	287.276	[M+H]+	22.16	56760	21573.7
200.211	199.204	[M+H]+	22.34	448232	0
200.251	199.244	[M+H]+	22.34	225762	232285
249.133	250.141	[M-H]-	22.36	22167.7	31472
288.282	287.275	[M+H]+	22.36	191385	46004.3
288.294	287.287	[M+H]+	22.36	47400	91487.3
225.175	224.168	[M+H]+	22.5	65898.7	15781
225.209	224.202	[M+H]+	22.5	33668	31829.3
288.283	287.275	[M+H]+	22.54	195095	47046.3
288.294	287.287	[M+H]+	22.54	46858.7	94854.3
214.23	213.223	[M+H]+	22.55	285563	73935.3
214.267	213.259	[M+H]+	22.55	143887	148361
113.022	112.015	[M+H]+	22.56	24282	0
113.081	112.073	[M+H]+	22.56	0	17996.3
113.062	112.055	[M+H]+	22.57	13536.7	12539
244.247	243.239	[M+H]+	22.58	25242.3	6135
244.273	243.266	[M+H]+	22.6	12097.3	11739.7
230.26	229.253	[M+H]+	22.65	813715	788520
459.508	458.501	[M+H]+	22.65	25078.3	18415.7
230.228	229.22	[M+H]+	22.66	1.6196e+06	386133
161.063	160.056	[M+H]+	22.81	28718	2195.67
161.108	160.101	[M+H]+	22.82	14260.3	13315.3
236.125	237.132	[M-H]-	22.82	35627.3	39965.7
293.201	294.208	[M-H]-	22.82	214319	246820
245.088	244.081	[M+H]+	22.87	15263	15599.7
148.988	147.981	[M+H]+	22.88	278589	1141.33
149.032	148.025	[M+H]+	22.88	141559	214137
177.024	176.016	[M+H]+	22.88	106896	0
177.068	176.06	[M+H]+	22.88	55209	51455.3
245.061	244.053	[M+H]+	22.88	22377	7747.33
157.135	156.127	[M+H]+	22.97	6880	13226.7
255.108	254.1	[M+H]+	23.02	14672.3	0
255.133	254.126	[M+H]+	23.02	3995.33	10408.3
311.186	310.179	[M+H]+	23.02	45063.3	17069.3
309.197	310.204	[M-H]-	23.03	62165.3	58174.7
313.322	312.315	[M+H]+	23.15	53387.3	20754
325.238	324.231	[M+H]+	23.15	29162.7	6838
469.3	486.303	[M-H2O+H]+	23.15	21010	23777
531.324	532.332	[M-H]-	23.16	30075.7	29177
336.29	335.283	[M+H]+	23.22	38967	11024.7
174.961	173.954	[M+H]+	23.26	14991	0
175.005	173.998	[M+H]+	23.26	7674.67	7553.33
268.253	267.246	[M+H]+	23.33	49774.7	10684
268.272	267.265	[M+H]+	23.33	8900.33	20923.7
371.339	370.332	[M+H]+	23.33	51849.7	28719.3
233.17	232.162	[M+H]+	23.34	44052.3	14662.3
325.238	324.23	[M+H]+	23.34	103301	20442.7
504.337	503.33	[M+H]+	23.34	25119.3	21471.3
509.293	486.303	[M+Na]+	23.34	54116.7	26329
995.433	994.426	[M+H]+	23.34	16550.3	0
135.121	134.114	[M+H]+	23.35	7916.33	13258.3
233.202	232.196	[M+H]+	23.35	32741	22245.7
531.324	532.332	[M-H]-	23.35	93370	76736
694.405	693.397	[M+H]+	23.4	22638.3	13220.3
353.272	352.264	[M+H]+	23.41	63495.7	15210
699.359	698.352	[M+H]+	23.41	27196	15381.7
101.965	100.957	[M+H]+	23.42	236113	365.333
102.003	100.996	[M+H]+	23.42	121284	115245
102.026	101.019	[M+H]+	23.42	87.3333	171058
214.102	213.095	[M+H]+	23.42	642718	163531
214.138	213.131	[M+H]+	23.43	311008	314344
518.341	517.334	[M+H]+	23.44	13367.7	13077.3
316.321	315.314	[M+H]+	23.5	133492	49807.7
225.212	224.204	[M+H]+	23.51	67786.7	17040.7
272.284	271.277	[M+H]+	23.51	20384.7	3712.33
272.302	271.295	[M+H]+	23.51	4090.33	8268
225.245	224.238	[M+H]+	23.52	34464.7	33540
228.248	227.241	[M+H]+	23.52	282831	70460.7
228.281	227.274	[M+H]+	23.52	141898	141519
476.296	475.289	[M+H]+	23.54	11848.7	10705.3
111.08	128.083	[M-H2O+H]+	23.56	142956	1540
111.139	110.131	[M+H]+	23.56	130	104011
239.143	238.135	[M+H]+	23.56	74168.7	19119
239.172	238.165	[M+H]+	23.56	37088	38516
111.12	128.125	[M-H2O+H]+	23.57	71591.3	68918
518.345	517.337	[M+H]+	23.63	21377	15703.7
242.266	241.259	[M+H]+	23.72	157730	40088
242.294	241.287	[M+H]+	23.73	78273.3	78877
288.258	287.251	[M+H]+	23.75	20646.7	41326.3
310.235	309.227	[M+H]+	23.75	27800.7	11042
106.049	105.042	[M+H]+	23.76	65966	1159.67
288.247	287.24	[M+H]+	23.76	82183.3	20591.3
258.289	257.281	[M+H]+	23.77	325740	634091
258.267	257.26	[M+H]+	23.78	1604991	0
515.571	514.563	[M+H]+	23.84	26012.3	19857
170.024	169.017	[M+H]+	23.88	13532	0
170.069	169.061	[M+H]+	23.9	7255.67	10431.3
111.08	110.073	[M+H]+	23.91	158474	2418
111.12	110.112	[M+H]+	23.92	77336	81962
111.139	110.131	[M+H]+	23.92	221	110616
304.297	303.29	[M+H]+	23.98	21540	3980.67
364.332	363.325	[M+H]+	24.16	94670.7	27393.7
129.019	128.012	[M+H]+	24.17	14009.3	51.6667
129.063	128.055	[M+H]+	24.17	9070.67	18701.7
171.068	170.06	[M+H]+	24.17	18829.3	0
253.127	252.119	[M+H]+	24.17	16439.3	0
253.152	252.145	[M+H]+	24.17	4251	7808
171.114	170.106	[M+H]+	24.18	9534.67	9274.33
341.354	340.347	[M+H]+	24.29	18479.3	3569.33
520.358	519.351	[M+H]+	24.33	10049	12248.3
309.232	310.239	[M-H]-	24.39	26845.3	24594.7
277.204	278.211	[M-H]-	24.5	25397.7	22720.7
353.268	352.26	[M+H]+	24.56	61538	25148.7
261.211	260.204	[M+H]+	24.57	37333	9185.33
261.231	238.242	[M+Na]+	24.57	12239	11951.3
353.277	352.27	[M+H]+	24.57	51663.3	18545.7
532.37	531.363	[M+H]+	24.57	46547.7	7025.67
537.326	514.334	[M+Na]+	24.57	41265.7	7884.67
423.29	422.282	[M+H]+	24.58	27354.3	8935
559.358	560.365	[M-H]-	24.58	36546.3	25161.7
111.08	110.073	[M+H]+	24.59	83621.3	1142.33
111.12	110.112	[M+H]+	24.59	44900	43062.3
111.139	110.131	[M+H]+	24.59	0	61724.7
199.143	198.135	[M+H]+	24.59	75938	342.667
199.183	198.176	[M+H]+	24.59	38310	38676.3
293.235	294.242	[M-H]-	24.59	74089.3	49852.3
325.199	324.191	[M+H]+	24.59	71967	17213
325.199	324.192	[M+H]+	24.67	91717.3	18488
111.139	110.131	[M+H]+	24.69	91.3333	64368
215.142	214.135	[M+H]+	24.69	18822.3	4718.33
111.08	128.083	[M-H2O+H]+	24.7	88704.7	738.333
111.12	128.125	[M-H2O+H]+	24.7	44532.7	43658.7
215.177	214.17	[M+H]+	24.7	10166.3	9915.33
265.169	266.177	[M-H]-	24.72	171606	383897
431.256	432.263	[M-H]-	24.72	53704.7	41791
200.174	199.167	[M+H]+	24.74	19076.7	2962
200.215	199.207	[M+H]+	24.74	9372.67	9273.67
296.288	295.281	[M+H]+	24.76	16440.3	6958
399.373	398.366	[M+H]+	24.76	27618.3	16070.3
286.302	285.295	[M+H]+	24.81	36361.7	8916
286.313	285.306	[M+H]+	24.82	8692.67	17587
496.359	495.351	[M+H]+	24.9	16087	17028
332.332	331.324	[M+H]+	24.95	20963.3	4359.33
284.323	283.316	[M+H]+	24.99	62162.7	0
284.334	283.326	[M+H]+	24.99	30859.3	45430
431.255	432.262	[M-H]-	24.99	126732	88339.7
155.013	154.005	[M+H]+	25.1	80196	252.667
155.058	154.051	[M+H]+	25.1	41719.3	38515.7
211.087	210.08	[M+H]+	25.1	28024.3	6643.67
289.147	266.156	[M+Na]+	25.1	54431.7	14569.3
289.159	266.171	[M+Na]+	25.1	13409.7	28603.3
211.123	210.116	[M+H]+	25.11	13617.7	13519
342.338	341.331	[M+H]+	25.13	38754	8224
298.344	297.337	[M+H]+	25.18	17781.3	6557
369.393	368.386	[M+H]+	25.31	14642	3468.33
295.25	296.257	[M-H]-	25.33	33052.7	17419.3
327.078	326.073	[M+H]+	25.33	551941	101675
344.109	343.102	[M+H]+	25.33	17151.3	6464
675.139	674.131	[M+H]+	25.33	18215.3	5082.33
141.078	140.071	[M+H]+	25.34	142456	0
141.123	140.115	[M+H]+	25.34	71709.7	102924
214.193	213.186	[M+H]+	25.4	13534.7	2945.33
151.063	150.056	[M+H]+	25.41	14272.3	115.333
151.107	150.1	[M+H]+	25.41	11259.7	14353.3
316.286	315.279	[M+H]+	25.47	227307	91011
360.306	361.313	[M-H]-	25.49	997.667	29740.3
269.215	268.208	[M+H]+	25.51	3870	7180.33
107.035	106.028	[M+H]+	25.52	19712	213.667
235.15	234.142	[M+H]+	25.52	34557	8359
269.197	268.19	[M+H]+	25.52	18601.3	3758.33
273.162	272.154	[M+H]+	25.52	25765	6305.33
273.177	272.17	[M+H]+	25.52	6094.33	12234.3
317.196	316.189	[M+H]+	25.52	79806.7	13976.7
452.342	451.335	[M+H]+	25.52	282621	210927
457.298	434.307	[M+Na]+	25.52	295516	218696
107.074	106.067	[M+H]+	25.53	10140	9854.33
145.087	162.09	[M-H2O+H]+	25.53	43922	0
145.131	162.135	[M-H2O+H]+	25.53	23104.7	33645
233.174	234.181	[M-H]-	25.53	24485.3	22399.7
235.18	234.173	[M+H]+	25.53	17512.7	16534.7
253.249	252.242	[M+H]+	25.55	79556	0
253.274	252.267	[M+H]+	25.55	19499.7	40075.3
213.127	212.119	[M+H]+	25.76	11374	3777
213.162	212.155	[M+H]+	25.76	8171.67	7576.67
161.063	160.056	[M+H]+	25.81	50524	0
277.172	276.165	[M+H]+	25.81	15520	4637
277.186	276.179	[M+H]+	25.81	4733	7946
161.109	160.102	[M+H]+	25.82	26413.7	13940
311.193	312.2	[M-H]-	25.87	40383	22083
163.042	162.035	[M+H]+	26.01	14247	0
163.087	162.08	[M+H]+	26.01	7677.67	7356
243.225	242.218	[M+H]+	26.02	82954	20476.3
243.253	242.246	[M+H]+	26.02	40925.7	42583
281.164	280.157	[M+H]+	26.08	28338.7	0
281.176	280.168	[M+H]+	26.08	7509.67	21427
129.02	128.013	[M+H]+	26.09	16776.7	0
129.064	128.056	[M+H]+	26.09	7974.67	15933.7
185.087	184.079	[M+H]+	26.09	31684.7	0
185.129	184.122	[M+H]+	26.09	15192.7	15612.7
756.544	755.536	[M+H]+	26.25	7241.67	11684.7
273.174	272.167	[M+H]+	26.26	25000.7	5882.67
273.19	272.183	[M+H]+	26.26	6391.67	12123
301.139	300.132	[M+H]+	26.26	143558	28164.7
120.992	119.985	[M+H]+	26.27	34089	236.667
121.034	120.027	[M+H]+	26.27	17456	26178.3
148.988	165.993	[M-H2O+H]+	26.27	843457	689.333
149.032	166.037	[M-H2O+H]+	26.27	420047	637608
223.076	222.068	[M+H]+	26.27	15942.3	4001.33
223.109	222.102	[M+H]+	26.27	8133.33	7680.33
279.151	278.143	[M+H]+	26.27	18459.3	0
279.164	278.157	[M+H]+	26.27	4775	13524.7
205.063	204.055	[M+H]+	26.29	62541	15152.3
279.186	280.193	[M-H]-	26.32	171045	175940
427.407	426.4	[M+H]+	26.32	13752.3	7782
205.1	204.093	[M+H]+	26.34	32298.7	61778
157.088	156.08	[M+H]+	26.35	13758	2008
367.219	366.212	[M+H]+	26.35	20842.3	5132.33
157.138	156.131	[M+H]+	26.36	4392.33	9162.67
171.068	170.061	[M+H]+	26.36	25244	0
171.112	170.105	[M+H]+	26.36	12752.3	12234
249.206	250.213	[M-H]-	26.38	50102.3	41463.7
309.2	310.208	[M-H]-	26.39	0	118675
433.27	434.278	[M-H]-	26.41	30424	20709.7
177.104	176.097	[M+H]+	26.45	15438.7	15573.3
177.061	176.053	[M+H]+	26.46	33304.7	1874
309.198	310.205	[M-H]-	26.54	30761.3	22163.3
250.165	251.172	[M-H]-	26.62	51893.3	45270
340.397	339.39	[M+H]+	26.66	21974.3	8552
228.212	227.205	[M+H]+	26.77	59237.3	13232.3
228.245	227.238	[M+H]+	26.78	28593.7	28373.7
732.541	731.534	[M+H]+	26.82	18758	9598.67
688.523	687.516	[M+H]+	26.87	30710.7	15580.3
644.508	643.5	[M+H]+	26.93	46305.3	23290.7
368.437	367.429	[M+H]+	26.95	23445.7	11978
600.485	599.478	[M+H]+	26.99	68199.3	34951
121.929	120.922	[M+H]+	27.01	65215	0
121.972	120.965	[M+H]+	27.03	33352.7	49534
556.463	555.456	[M+H]+	27.05	100386	24905.7
561.416	560.409	[M+H]+	27.05	18499.3	9524.67
124.094	123.087	[M+H]+	27.06	10431	10446
131.926	130.919	[M+H]+	27.06	30806.3	255
131.97	130.962	[M+H]+	27.08	20025.3	40064
124.05	123.043	[M+H]+	27.09	22011.3	661.333
512.436	511.429	[M+H]+	27.1	128264	93468
517.391	494.402	[M+Na]+	27.12	28555	22442.7
473.365	450.377	[M+Na]+	27.16	77038.7	59229
425.232	424.225	[M+H]+	27.17	40836.3	11485
468.41	467.403	[M+H]+	27.17	114125	85627.7
141.078	140.071	[M+H]+	27.18	179490	0
344.32	343.312	[M+H]+	27.18	257600	103992
111.08	110.073	[M+H]+	27.19	1718245	3449.67
141.122	140.115	[M+H]+	27.19	87942	128649
199.143	198.136	[M+H]+	27.19	476571	442.333
388.339	389.346	[M-H]-	27.19	1236	33728.7
111.119	110.112	[M+H]+	27.2	443944	876925
111.139	110.131	[M+H]+	27.2	0	1214620
199.183	198.176	[M+H]+	27.2	236031	244488
309.204	308.197	[M+H]+	27.2	190608	71211
325.212	326.219	[M-H]-	27.2	19158.3	25701
353.23	354.237	[M-H]-	27.2	12389	81582.3
377.303	378.31	[M-H]-	27.2	118867	117855
293.204	294.211	[M-H]-	27.21	36767.3	99947
424.38	423.373	[M+H]+	27.22	83092.7	40834.3
429.336	406.346	[M+Na]+	27.22	128198	67693.3
115.985	229.955	[M+H+H]2+	27.23	7440.67	21334
195.096	194.089	[M+H]+	27.27	17623.3	0
363.32	362.318	[M+H]+	27.27	225175	54311.3
195.137	194.13	[M+H]+	27.28	11526	12368.7
151.062	150.054	[M+H]+	27.29	128179	0
151.107	150.099	[M+H]+	27.3	64185	64795
319.284	318.278	[M+H]+	27.3	232324	43746.7
357.249	356.242	[M+H]+	27.3	22433.7	5710
228.213	227.205	[M+H]+	27.32	172571	41554.3
228.245	227.237	[M+H]+	27.32	84083.3	85429.3
107.034	106.027	[M+H]+	27.34	191074	1199.33
107.094	106.086	[M+H]+	27.34	68	145901
275.249	274.241	[M+H]+	27.34	74237.3	0
275.262	274.255	[M+H]+	27.34	17678.3	52827
297.237	296.23	[M+H]+	27.34	173985	35511
107.073	106.066	[M+H]+	27.35	95344.3	95359
368.438	367.43	[M+H]+	27.37	64139.3	41964.7
106.05	105.043	[M+H]+	27.56	25255.7	2003
370.343	369.336	[M+H]+	27.56	80201	39396.7
106.089	105.082	[M+H]+	27.57	10978.3	13866.7
106.11	105.102	[M+H]+	27.57	0	18906.3
279.223	278.216	[M+H]+	27.68	32176.7	446
279.235	278.228	[M+H]+	27.68	11310.3	23042.3
277.24	278.247	[M-H]-	27.69	237077	195081
333.153	332.145	[M+H]+	27.69	24620	6299.33
377.173	378.18	[M-H]-	27.69	105936	80794.7
345.231	346.238	[M-H]-	27.7	19077.7	15793
353.23	354.238	[M-H]-	27.73	5789	63326.7
195.096	194.089	[M+H]+	27.76	18531.7	0
271.264	270.257	[M+H]+	27.76	115611	24278.3
271.282	270.274	[M+H]+	27.76	23238.7	44811.7
618.443	617.436	[M+H]+	27.79	14527.3	8502.33
199.143	198.136	[M+H]+	27.85	54203.3	13297.7
395.255	394.248	[M+H]+	27.92	36096	16616.3
570.478	569.471	[M+H]+	27.94	19545.3	4585.67
611.484	610.477	[M+H]+	27.96	14285	9634.67
773.505	772.498	[M+H]+	27.96	19871	12753.7
526.451	525.444	[M+H]+	28	27939.3	19130.7
482.425	481.418	[M+H]+	28.06	27920	20226.3
421.369	420.362	[M+H]+	28.12	20028	10179.7
438.397	437.389	[M+H]+	28.12	18949.7	14283.7
127.075	126.068	[M+H]+	28.13	21827	263.333
127.117	126.11	[M+H]+	28.13	11916.3	16643
377.339	376.333	[M+H]+	28.17	42199.7	20639.7
333.3	332.293	[M+H]+	28.2	32738.3	6188.33
355.29	354.282	[M+H]+	28.2	28627.3	7555.33
151.107	150.1	[M+H]+	28.22	14183.7	21389.3
256.252	255.244	[M+H]+	28.23	46303.7	0
256.274	255.266	[M+H]+	28.23	8737	17374.7
607.275	606.268	[M+H]+	28.23	23144	8274.33
311.254	310.247	[M+H]+	28.26	22270.7	8585.67
745.484	762.487	[M-H2O+H]+	28.35	26848	30201.3
785.461	784.454	[M+H]+	28.36	16293.3	0
583.449	582.442	[M+H]+	28.38	22230.7	22264.7
253.239	254.246	[M-H]-	28.4	9038	31736
600.436	599.428	[M+H]+	28.44	113343	55965.3
239.229	238.222	[M+H]+	28.46	2241939	568266
239.258	238.251	[M+H]+	28.47	1.14307e+06	1.11163e+06
282.271	281.264	[M+H]+	28.55	18786.7	0
282.282	281.275	[M+H]+	28.55	5193.33	13658
127.123	126.115	[M+H]+	28.56	9899.33	21104
745.481	762.485	[M-H2O+H]+	28.61	17303	19019.7
171.108	170.101	[M+H]+	28.62	47375	76
425.305	424.298	[M+H]+	28.62	33911	19723.3
171.152	170.145	[M+H]+	28.63	23006.7	27527
279.255	280.263	[M-H]-	28.64	81371	72741.3
716.548	715.54	[M+H]+	28.65	15030.3	7329.67
583.451	582.443	[M+H]+	28.7	18504.3	26308.3
672.53	671.523	[M+H]+	28.71	23726	11508
778.523	777.515	[M+H]+	28.72	41362	53915.7
243.177	242.17	[M+H]+	28.73	13951.7	6809
409.309	408.301	[M+H]+	28.73	15829.3	7406
628.514	627.506	[M+H]+	28.78	37646.3	18348
584.491	583.483	[M+H]+	28.85	56313	28537
540.469	539.462	[M+H]+	28.92	83146.7	20703.3
545.423	544.416	[M+H]+	28.92	17357.7	4285.33
496.441	495.434	[M+H]+	28.98	95380.7	72767
501.396	500.389	[M+H]+	28.98	39357	28251.7
106.089	105.081	[M+H]+	28.99	7627.33	9173
372.358	371.351	[M+H]+	28.99	37954.3	19148.3
452.414	451.407	[M+H]+	29.04	83516	60819.3
457.37	434.38	[M+Na]+	29.04	81091.3	60950.7
429.328	428.321	[M+H]+	29.08	14649.3	13252.7
195.096	194.089	[M+H]+	29.09	16407.3	0
195.137	194.129	[M+H]+	29.09	8303.33	13298.3
391.356	390.35	[M+H]+	29.09	162227	81316
408.381	407.373	[M+H]+	29.09	36433.7	17970.3
151.062	150.054	[M+H]+	29.12	74024.7	0
347.32	346.312	[M+H]+	29.12	166273	65953.3
369.31	368.302	[M+H]+	29.12	163592	81848
151.107	150.098	[M+H]+	29.13	36414.3	36262.3
367.293	368.3	[M-H]-	29.13	132498	109023
256.274	255.266	[M+H]+	29.14	20856.7	41257.3
256.252	255.244	[M+H]+	29.15	113869	169.333
609.29	608.283	[M+H]+	29.16	32369	10869.7
325.271	302.281	[M+Na]+	29.17	79101.3	14757
107.034	106.027	[M+H]+	29.18	43538.3	207.333
107.073	106.066	[M+H]+	29.18	20933	21049
377.303	378.311	[M-H]-	29.18	137249	121417
397.261	398.268	[M-H]-	29.26	2404.67	11891.3
111.121	110.113	[M+H]+	29.42	14368.3	7610.67
611.484	610.476	[M+H]+	29.52	11648.3	11686.7
813.506	812.499	[M+H]+	29.53	3981	15420.3
141.078	140.071	[M+H]+	29.56	277620	0
255.254	256.261	[M-H]-	29.57	130906	126112
293.205	294.212	[M-H]-	29.57	0	241986
355.187	356.194	[M-H]-	29.57	126296	125531
593.294	592.287	[M+H]+	29.58	1488350	652826
625.283	624.276	[M+H]+	29.59	15174	9239.33
926.593	925.586	[M+H]+	29.68	0	34907.7
585.473	584.466	[M+H]+	29.69	35444.3	9807.33
931.457	930.45	[M+H]+	29.69	25382.3	0
926.504	925.497	[M+H]+	29.7	37029.3	0
931.549	930.542	[M+H]+	29.7	0	22888.3
141.122	140.115	[M+H]+	29.78	100251	186251
281.271	282.278	[M-H]-	29.78	107029	155594
381.204	382.211	[M-H]-	29.79	22055.3	41766.7
736.498	735.491	[M+H]+	29.86	36870.7	26911
313.322	312.315	[M+H]+	29.87	14156.7	6960
741.449	740.442	[M+H]+	29.87	18608.3	14639.3
171.112	170.104	[M+H]+	29.92	11831.3	10749.3
195.143	194.136	[M+H]+	29.93	3367.33	6912.67
236.083	235.075	[M+H]+	29.93	54257.7	52988
267.287	266.28	[M+H]+	29.93	6115.67	12611.3
130.166	129.159	[M+H]+	29.95	17482.3	33726.3
225.245	224.238	[M+H]+	29.95	14256.3	13925
116.938	117.945	[M-H]-	29.96	10304.3	0
124.092	123.085	[M+H]+	29.96	55051	79287.7
171.068	170.061	[M+H]+	29.96	22611	0
173.048	172.04	[M+H]+	29.96	24803	2829
173.091	172.084	[M+H]+	29.96	12114.3	12528.3
228.248	227.241	[M+H]+	29.96	122060	30520.3
230.228	229.221	[M+H]+	29.96	309503	75386.7
258.267	219.304	[M+K]+	29.96	222950	0
341.271	340.264	[M+H]+	29.96	24959	0
105.921	104.913	[M+H]+	29.97	13762.7	0
121.93	82.9685	[M+K]+	29.97	207938	104.333
121.972	120.964	[M+H]+	29.97	105163	157257
130.122	129.115	[M+H]+	29.97	34401.7	408.667
131.926	130.918	[M+H]+	29.97	140211	1373.67
144.947	143.94	[M+H]+	29.97	41610.7	0
214.231	213.224	[M+H]+	29.97	141295	36132.7
217.081	216.074	[M+H]+	29.97	33426.7	8482.33
217.116	216.109	[M+H]+	29.97	16466.7	16275.3
225.212	224.205	[M+H]+	29.97	30152.3	7027.33
230.26	229.253	[M+H]+	29.97	151887	153322
239.259	238.251	[M+H]+	29.97	108358	112112
242.266	241.259	[M+H]+	29.97	81990	20575.7
267.269	266.262	[M+H]+	29.97	31964.7	5981
385.305	384.298	[M+H]+	29.97	26850	13041.3
739.879	2216.61	[M+H+H2]3+	29.97	14578.7	10464.3
741.528	2221.56	[M+H+H2]3+	29.97	15203	11553
124.05	123.043	[M+H]+	29.98	110588	1537.33
131.969	130.962	[M+H]+	29.98	67513	136006
144.991	143.983	[M+H]+	29.98	21622.7	30504.3
200.211	199.204	[M+H]+	29.98	215651	846.333
200.251	199.244	[M+H]+	29.98	105720	110062
214.266	213.259	[M+H]+	29.98	68623	70410.3
228.281	227.273	[M+H]+	29.98	58888	61492.3
239.23	238.222	[M+H]+	29.98	222760	56777
258.289	257.282	[M+H]+	29.98	43154.7	87306.7
284.288	566.562	[M+H+H]2+	29.98	64243.3	6794.67
293.202	294.209	[M-H]-	29.98	211274	90917.3
236.053	235.045	[M+H]+	29.99	116989	26570
284.298	566.582	[M+H+H]2+	29.99	13254.3	43255.7
621.287	620.28	[M+H]+	29.99	93797.3	93415.3
